# Supplementary material for: Technical Note: Advances in flash flood monitoring using unmanned aerialvehicles (UAVs)
Source: Copernicus journal article supplement (doi:10.5194/hess-20-4005-2016), 2016-10-05
Supplement: Supplementary file 1 [file hess-20-4005-2016-supplement.zip]

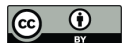

## *Supplement of*

# **Technical Note: Advances in flash flood monitoring using unmanned aerial vehicles (UAVs)**

**Matthew T. Perks et al.**

*Correspondence to:* M. T. Perks ([matthew.perks@ncl.ac.uk](mailto:matthew.perks@ncl.ac.uk))

- [hess-20-4005-2016-supplement-title-page.pdf](#)
- [Clip1GrayNoAdj.mp4](#)

The copyright of individual parts of the supplement might differ from the CC-BY 3.0 licence.
